# Supplementary material for: The full-length BEND2 protein is dispensable for spermatogenesis but required for setting the ovarian reserve in mice
Source: eLife journal article supplement (doi:10.7554/elife.96052), 2024-04-29
Supplement: fig1-figsupp1-data2 [file elife-96052-fig1-figsupp1-data2-v1.zip]

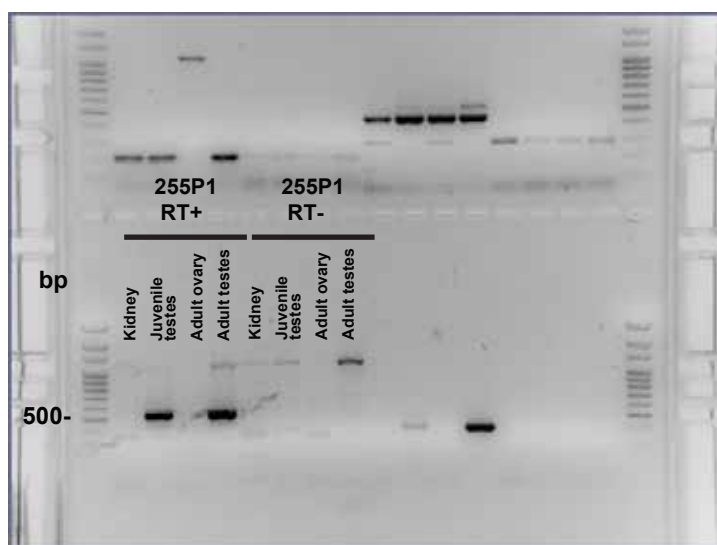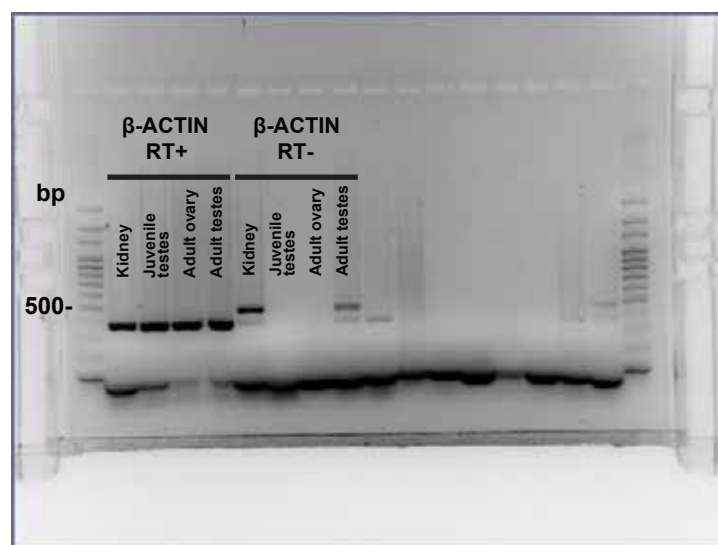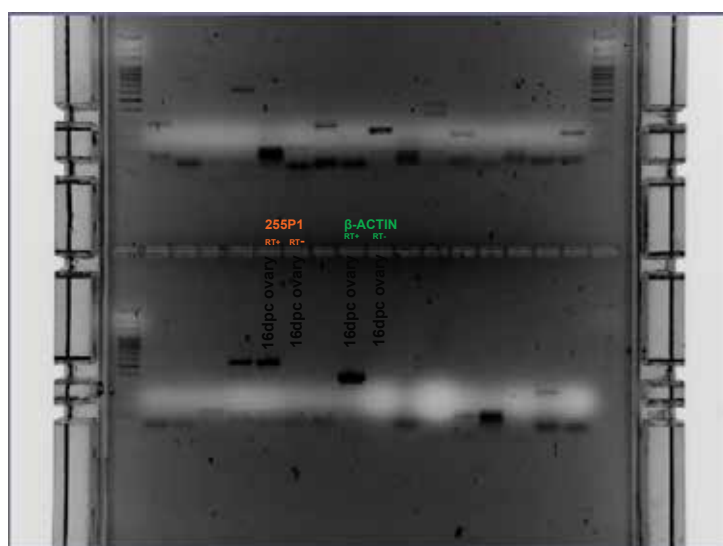

**Figure S1, Source Data 2.**

**Original gel corresponding to Figure 1, panel A.**

The labeled lanes show 255P1 expression in different mouse tissues;  $\beta$ -ACTIN serves as a loading control.
