# Supplementary material for: The full-length BEND2 protein is dispensable for spermatogenesis but required for setting the ovarian reserve in mice
Source: eLife journal article supplement (doi:10.7554/elife.96052), 2024-04-29
Supplement: fig2-data2 [file elife-96052-fig2-data2-v1.zip]

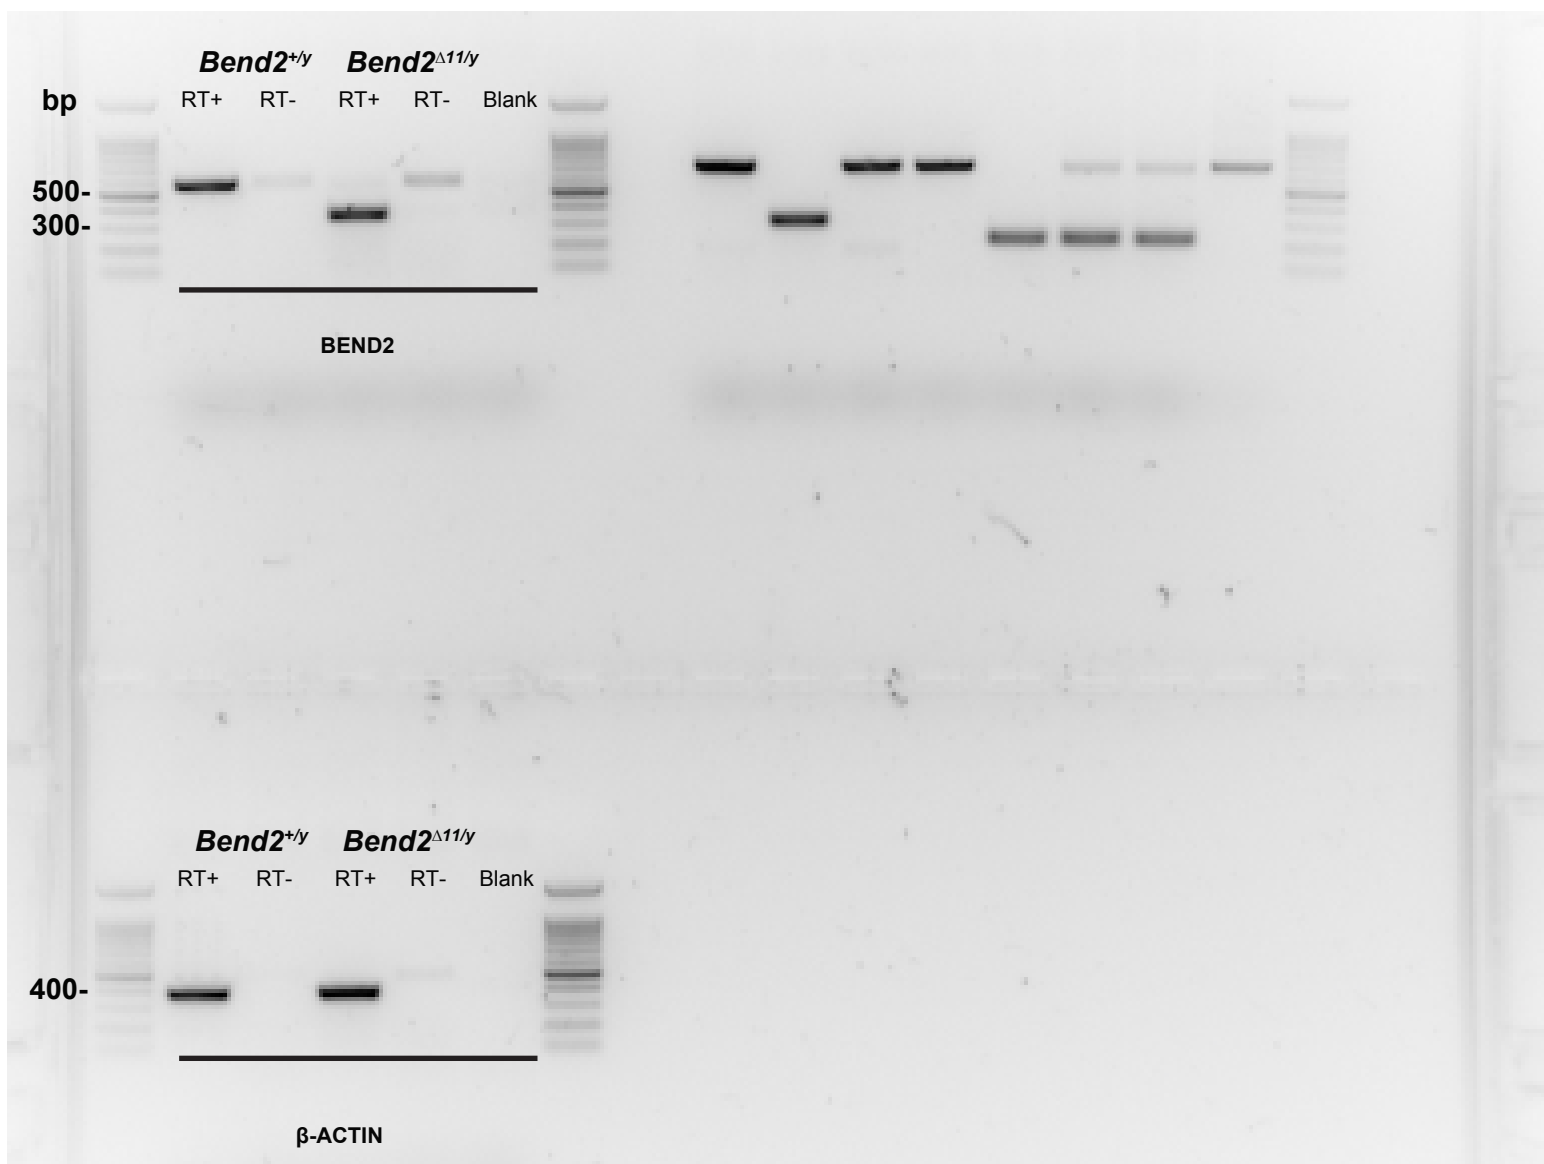

**Figure 2, Source Data 2.**

**Original gel corresponding to Figure 2, panel B.**

**Left panel:** BEND2 expression in control and knockout testis;  $\beta$ -ACTIN serves as a loading control.

**Right panel:** Expression of additional testis-expressed genes not included in Figure 2.

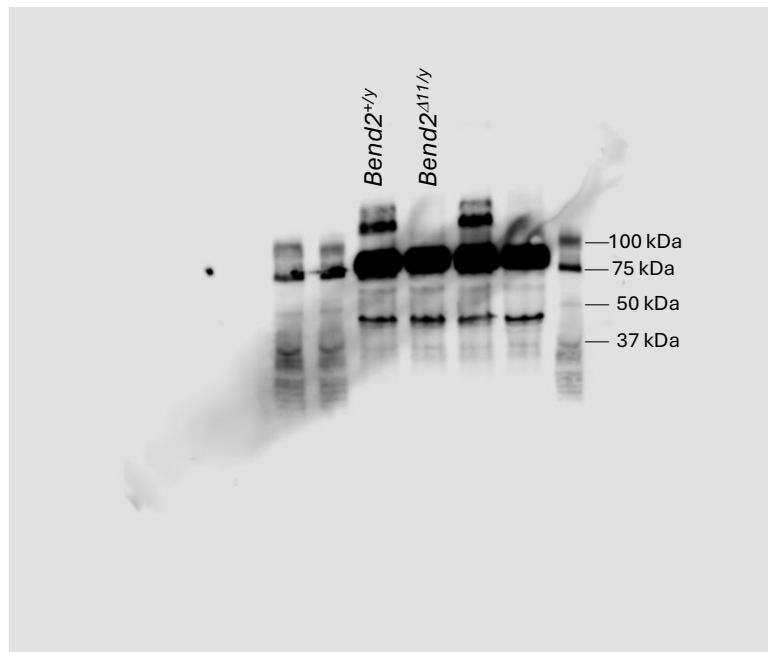

**Figure 2, Source Data 2.**

**Original gel corresponding to Figure 2, panel C.**

**The labeled lanes show BEND2 expression in mouse adult testis. Bio-rad precision marker is employed**
