# Supplementary material for: The full-length BEND2 protein is dispensable for spermatogenesis but required for setting the ovarian reserve in mice
Source: eLife journal article supplement (doi:10.7554/elife.96052), 2024-04-29
Supplement: fig4-figsupp1-data2 [file elife-96052-fig4-figsupp1-data2-v1.zip]

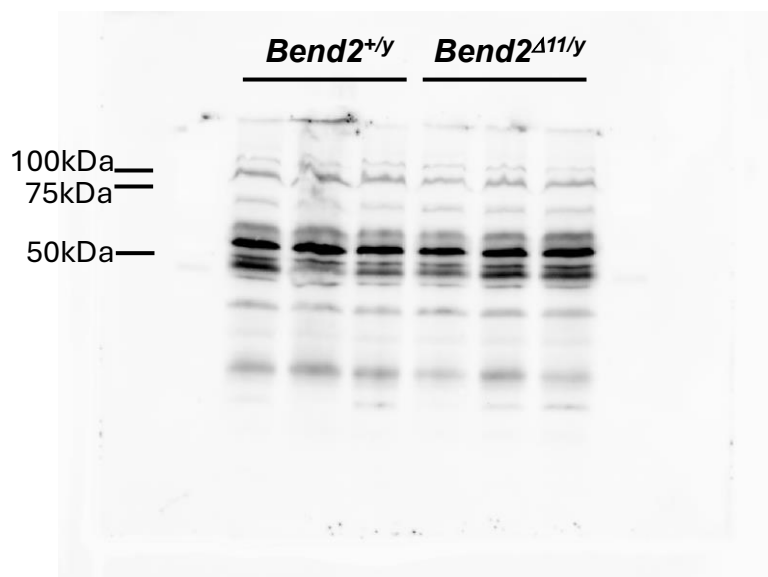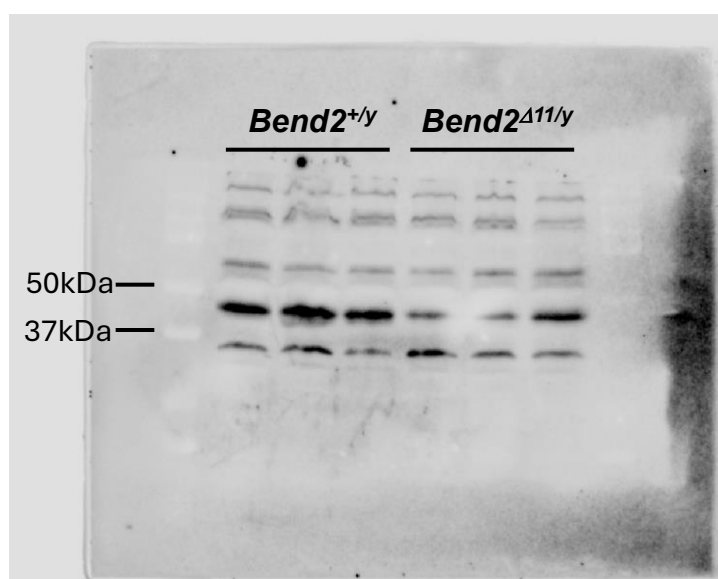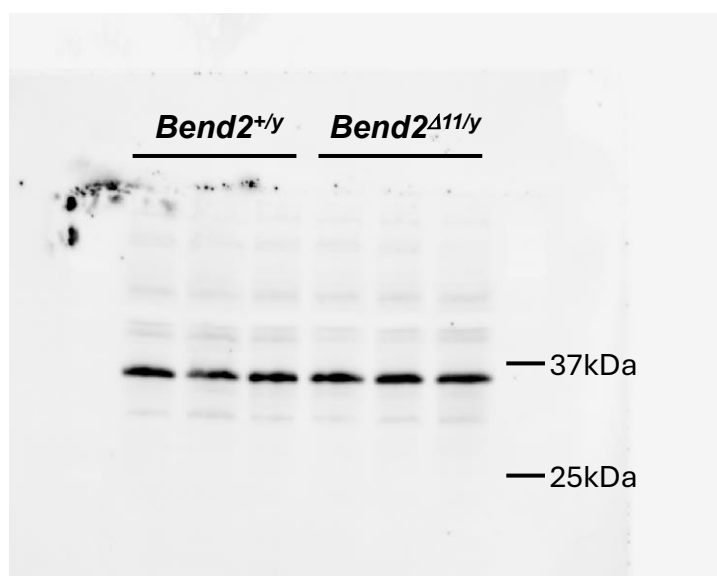

**Figure S2, Source Data 2. Original gel corresponding to Figure S2, panel D.**  
**Top panel:** KU70 western blot; **Mid panel:** LINE-1 western blot; **Bottom panel:** GAPDH western blot.
